# Supplementary material for: Gender-Associated Genes in Filarial Nematodes Are Important for Reproduction and Potential Intervention Targets
Source: PLoS Negl Trop Dis. 2011 Jan 25;5(1):e947. doi: 10.1371/journal.pntd.0000947 (PMC3026763; doi:10.1371/journal.pntd.0000947)
Supplement: Table S9 — Intrinsic-enriched potential C. elegans homologs of filarial gender-associated genes. (0.03 MB XLS) [file pntd.0000947.s009.xls]

## Sheet: vs. male phenotype
potential C. elegans homologue	filarial gene ID	RNAi pheotype	NR annotation
R01H2.6	14229.m00039	EAT48795.1| ubiquitin-conjugating enzyme E2 l	3.80469
F58A4.10	14356.m00511	CAE65167.1| Hypothetical protein CBG10037	2.34542
F45G2.9	TC3662	CAE73695.1| Hypothetical protein CBG21206	1.83102
W06E11.4	TC3174	XP_396646.1| PREDICTED: similar to Shwachman-Bodian-Diamond syndrome protein [Apis mellifera]	2.25338
F15B9.4	14409.m00244	NP_506253.3| F15B9.4 (Rho GTPase effector BNI1 and related formins) [Caenorhabditis elegans]	6.33742
F02E9.7	BMC08365	CAE67273.1| Hypothetical protein CBG12721	2.01565
M01E11.3	14992.m11277	CAE58965.1| Hypothetical protein CBG02237	1.69026
C01H6.9	15003.m00141	XP_784842.2| PREDICTED: similar to haploid germ cell-specific nuclear protein kinase	3.53704
F10C2.4	BMC06381	NP_506017.1| F10C2.4 [Caenorhabditis elegans]	2.79319
K03C7.1	BMW00486	I-connectin, putative	4.70375
F33A8.1	14977.m05069	EAA12244.3| ENSANGP00000007281 [Anopheles gambiae str. PEST]	6.87285
F10B5.7	14920.m00401	CAE57720.1| Hypothetical protein CBG00730 [Caenorhabditis briggsae]	2.27628
EEED8.5	BMC10179	CAE59095.1| Hypothetical protein CBG02387 (Helicase, C-terminal)	3.87061
Y106G6H.12	14975.m04365	NP_492736.1| Deubiquitylating with USP/UBP and OTU domains family member (duo-3	2.63873
C03C11.2	14042.m00081	AAT72407.1| FOG-3 [Caenorhabditis japonica]	10.9398
C10G11.8	14980.m02817	CAE65902.1| Hypothetical protein CBG11069 (AAA ATPase, core)	3.53218

## Sheet: vs. female phenotype
potential C. elegans homologue	filarial gene ID	RNAi pheotype	NR annotation
M18.8	12539.m00101	WT	AAX30883.2| SJCHGC08456 protein [Schistosoma
C48B6.2	12902.m00235	Emb Unclassified Pvl Ste Stp Gro Lvl Lva	NP_491972.1| C48B6.2 [Caenorhabditis elegans]
T24B8.2	13101.m00017	not_Emb	CAE59793.1| Hypothetical protein CBG03253
ZK287.5	13212.m00014	Pvl Lon Unc Lva Pnm Emb	AAH17370.2| RBX1 protein [Homo sapiens]
F22B5.7	13239.m00093	Egl Pvl Bmd Pnm Emb	CAE57635.1| Hypothetical protein CBG00620 [Caenorhabditis briggsae]
C26B2.6	13358.m00040	WT	CAE70937.1| Hypothetical protein CBG17740
F22B5.1	13401.m00088	Pvl Unc Ste Bmd Stp Gro Rup Emb	P36404|ARL2_HUMAN ADP-ribosylation factor-like protein 2
B0035.1A	13415.m00443	not_Emb	NP_502124.1| B0035.1b [Caenorhabditis elegans]
H02I12.1	13606.m00009	Osmotic	AAR30186.1| RE46519p [Drosophila melanogaster]
F13E9.1	13618.m00050	not_Emb	NP_502016.2| F13E9.1 [Caenorhabditis elegans]
F10G7.1	13644.m00286	Pch Emb Unc Gro	NP_494840.1| Temporarily Assigned Gene name family member (tag-151) [Caenorhabditis elegans
C44B7.1	13663.m00020	not_Emb	NP_495413.1| C44B7.1 [Caenorhabditis elegans]
F59A3.4	13736.m00395	WT	NP_491614.1| F59A3.4 [Caenorhabditis elegans]
T12D8.2	14036.m00110	not_Emb	EAT44633.1| splicing factor, putative [Aedes
F40F8.1	14062.m00073	Emb	EAT40122.1| cytidylate kinase [Aedes aegypti]
F55F8.6	14204.m00108	Emb	CAE68941.1| Hypothetical protein CBG14921
Y47G6A.12	14276.m00245	Pvl Osmotic	CAE68974.1| Hypothetical protein CBG14956
Y110A7A.11	14276.m00251	Unclassified Abs Lva Ste Unc Gro Emb	NP_491521.2| Y110A7A.11 [Caenorhabditis elegans]
C05D2.10A	14538.m00470	WT	AAH46236.1| WD repeat domain 37 [Mus musculus]
ZK856.11	14634.m00555	Pch Emb Ste Lva Stp Gro	CAE64755.1| Hypothetical protein CBG09545
M03C11.2	14650.m00144	Emb	CAE71476.1| Hypothetical protein CBG18394 [Caenorhabditis briggsae]
R09E12.3	14923.m00295	WT	NP_001036957.1| Hsc70/Hsp90-organizing protein HOP [Bombyx mori]
ZK637.2	14950.m01854	not_Emb	NP_498961.2| ZK637.2 [Caenorhabditis elegans]
T22D1.9	14954.m01633	Sck Passage	CAE61757.1| Hypothetical protein CBG05716
Y55F3AM.12	14956.m00502	WT	NP_500030.1| mRNA DeCAPping enzyme family member (dcap-1)
C04F5.8	14961.m05030	Emb	CAE64075.1| Hypothetical protein CBG08678
ZC168.3	14961.m05054	Let Unc Rup Stp Pvl Emb	CAE70858.1| Hypothetical protein CBG17646
K07C5.6	14961.m05274	Unclassified Mlt Lva Sck Adl Emb	AAI06271.1| LOC432205 protein [Xenopus laevis]
F45E4.2	14972.m07434	not_Emb	NP_726579.1| Purine-rich binding protein-alpha CG1507-PA, isoform A
C03E10.4	14972.m07546	WT	NP_505864.1| GLYcosylation related family member (gly-20) [Caenorhabditis elegans]
C39E9.11	14972.m07819	Emb Unc	NP_502515.1| C39E9.11 (Mitotic checkpoint protein PRCC ) [Caenorhabditis elegans]
C16C10.4	14973.m02690	not_Emb	NP_497833.1| C16C10.4 [Caenorhabditis elegans]
C50C3.6	14973.m02705	Clr Pvl Ste Emb	XP_888301.1| PREDICTED: similar to Pre-mRNA processing splicing factor 8
Y47G6A.11	14974.m00819	Mut	NP_491163.1| MSH (MutS Homolog) family member (msh-6)
ZK1248.10	14975.m04544	Emb	CAE59197.1| Hypothetical protein CBG02508 (Ypt/Rab GTPase activating protein)
ZK20.4	14977.m04893	not_Emb	NP_496487.1| ZK20.4 [Caenorhabditis elegans]
ZK20.3	14977.m04894	Ste Sck	NP_496488.1| ZK20.3 [Caenorhabditis elegans]
C56C10.8	14977.m05032	Clr General	CAE60667.1| Hypothetical protein CBG04320 (Transcription factor BTF3 (human))
K12D12.2	14977.m05101	Clr Sister	CAE59387.1| Hypothetical protein CBG02744 (nucleoporin)
Y54E2A.12	14981.m02430	WT	NP_497068.2| Y54E2A.12 [Caenorhabditis elegans]
F29A7.6	14990.m07735	Pch Pvl not_Emb Lva Stp Gro	NP_494349.1| F29A7.6 [Caenorhabditis elegans]
Y54E10BR.6	14990.m07831	Ste Led Sck Lva Emb	CAE60566.1| Hypothetical protein CBG04195
R10H10.1	14990.m07927	Pch Emb Larval	CAE56867.1| Hypothetical protein CBG24700
F09G2.8	14992.m10846	WT	CAE72017.1| Hypothetical protein CBG19099 (Predicted phospholipase D)
C10B5.1	14992.m10849	WT	NP_505213.2| C10B5.1 [Caenorhabditis elegans
Y51B11A.1	14992.m10892	WT	AAB86941.1| microfilarial sheath protein SHP3 precursor [Brugia malayi]
F18E2.3	14992.m10991	Let Sister	NP_506193.1| yeast SCC (mitotic condensin subunit) homolog family member (scc-3)
K04D7.2A	14992.m11046	Unclassified Bmd Lva	NP_501860.1| K04D7.2a (AAA+-type ATPase) [Caenorhabditis elegans]
W04D2.6A	14992.m11049	Egl Unclassified Unc Lva Sck Gro	BAB27595.3| unnamed protein product [Mus musculus]
Y57E12AL.6	14992.m11311	Lvl Sck Passage	CAE71995.1| Hypothetical protein CBG19071
T08A11.2	15206.m00014	Pvl Unc Ste Adl Emb	NP_036565.2| splicing factor 3b, subunit 1 isoform 1 [Homo sapiens]
C07E3.1A	AA661234	Emb Unclassified Lva Sck	UNKNOWN
W01B11.3	BMC00568	Sle Muv Ste Larval	NP_491134.1| W01B11.3 [Caenorhabditis elegans]
W03D2.4	BMC01736	Sister	BAD72902.1| mus209 [Drosophila simulans]
T13F2.8	BMC02383	not_Emb	NP_501743.1| T13F2.8 (Caveolin) [Caenorhabditis elegans	NO	E
F48E8.2	BMC02724	Emb	NP_001047520.1| Os02g0635700 [Oryza sativa
F07C6.4A	BMC03228	Emb not_Emb	CAI13129.1| novel protein (FLJ10210) [Homo sapiens]
F46B6.3A	BMC03280	WT	CAG32693.1| hypothetical protein [Gallus gallus]
K02F3.11	BMC03362	not_Emb	XP_415051.1| PREDICTED: similar to Rnps1 protein [Gallus gallus]
ZK970.3	BMC03399	Dpy Pvl Sma not_Emb Lva Stp Gro Slu Emb	NP_496216.1| MeDiaTor family member (mdt-22) [Caenorhabditis elegans]
C01G10.8	BMC03468	WT	CAE66320.1| Hypothetical protein CBG11571 (Activator of Hsp90 ATPase, N-terminal)
Y18D10A.20	BMC05828	Unc Stp Cyk Emb	NP_493258.1| Y18D10A.20 [Caenorhabditis elegans]
C30C11.4	BMC06327	Pvl Lvl Unc Ste Lva Emb Rup Developmental	CAE71253.1| Hypothetical protein CBG18133
Y76B12C.2	BMC06503	WT	CAE70290.1| Hypothetical protein CBG16810
T21B10.7	BMC11865	Pch Osmotic	AAA93233.1| CCT-2
C05C8.5	BMW00525	not_Emb	NP_504838.1| C05C8.5 [Caenorhabditis elegans]
C25A1.6	N41102	Clr Gro	XP_849017.1| PREDICTED: similar to nucleolar protein family A, member 3 [Canis familiaris]
F58A4.10	TC3297	not_Emb	ABD36370.1| ubiquitin conjugating enzyme isoform 2 [Bombyx mori]
T26G10.1	TC3421	Dpy Stp Gro Larval	CAC14786.1| DEAD box protein [Homo sapiens]
Y54E5A.5	TC3450	not_Emb	CAE72566.1| Hypothetical protein CBG19750
F26D10.3	WB-contig-1184	Asymmetry	AF250996.1| Wuchereria bancrofti heat shock protein 70
F32A5.7	WB-contig_1431	Unc Bmd Emb Gro	CAE67582.1| Hypothetical protein CBG13115 (U6 small nuclear RNA-associated Sm-like protein LSm4)
